# Supplementary material for: Long-term neurological outcome of a cohort of 80 patients with classical organic acidurias
Source: PubMed Central journal article supplement (PMC4016503; doi:10.1186/1750-1172-8-148), 2013-09-23
Supplement: 1750-1172-8-148-S1.pdf [file 1750-1172-8-148-S1.pdf]

Additional file 1: Average plasma amino acid levels +/- standard deviation according to age by each disease. All available tests were included (at least one per year) except those obtained during acute decompensations. PA: propionic aciduria, MMA: methylmalonic aciduria, IVA, isovaleric aciduria.

|                 | Plasma glutamine ( $\mu\text{mol/L}$ ) |                |                | Plasma glycine ( $\mu\text{mol/L}$ ) |                |                | Plasma alanine ( $\mu\text{mol/L}$ ) |                |                |
|-----------------|----------------------------------------|----------------|----------------|--------------------------------------|----------------|----------------|--------------------------------------|----------------|----------------|
|                 | PA                                     | MMA            | IVA            | PA                                   | MMA            | IVA            | PA                                   | MMA            | IVA            |
| <b>0-3 y</b>    | 515 +/-<br>96                          | 562 +/-<br>98  | 448 +/-<br>82  | 831 +/-<br>297                       | 434 +/-<br>163 | 551 +/-<br>104 | 434 +/-<br>107                       | 450 +/-<br>120 | 481 +/-<br>112 |
| <b>3-6 y</b>    | 638 +/-<br>109                         | 583 +/-<br>109 | 375 +/-<br>91  | 1143 +/-<br>354                      | 643 +/-<br>324 | 489 +/-<br>100 | 471 +/-<br>116                       | 506 +/-<br>148 | 377 +/-<br>63  |
| <b>6-11 y</b>   | 621 +/-<br>93                          | 604 +/-<br>110 | 425 +/-<br>129 | 1485 +/-<br>539                      | 599 +/-<br>184 | 561 +/-<br>114 | 523 +/-<br>110                       | 518 +/-<br>98  | 410 +/-<br>67  |
| <b>&gt; 11y</b> | 760 +/-<br>166                         | 639 +/-<br>108 | 463 +/-<br>77  | 1472 +/-<br>389                      | 681 +/-<br>293 | 568 +/-<br>71  | 652 +/-<br>164                       | 597 +/-<br>147 | 435 +/-<br>102 |
